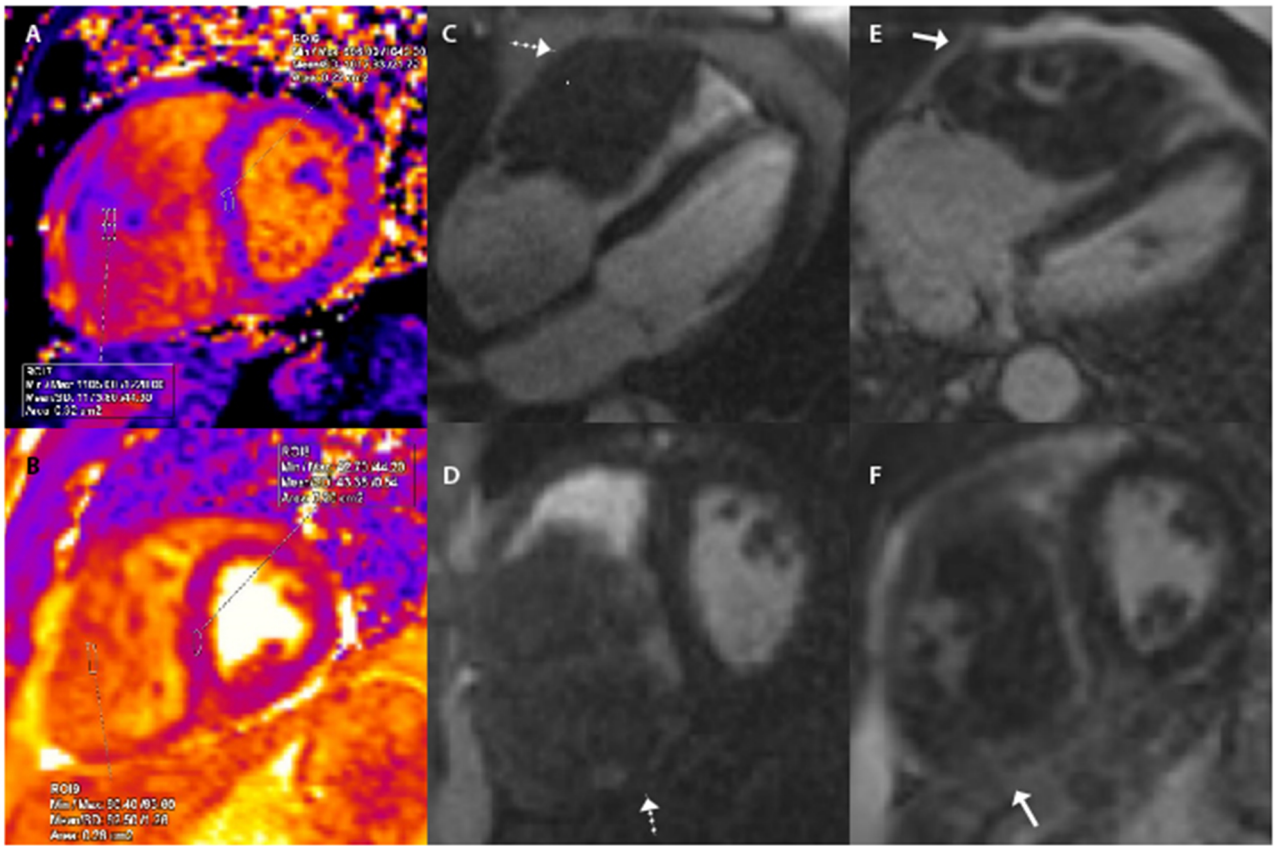

Short axis CMR showing increased T1 time of 1173 ms and T2 time of 60ms (Panel A and B). 4 chamber view (Panel C) and short axis view (Panel D) first pass perfusion CMR showing coronary artery supply to the mass (white interrupted arrow). 4 chamber view (Panel E) and short axis (panel F) LGE showing scarring (white arrow).

Downloaded from [https://academic.oup.com/hjcmimaging/article/20/Supplement\\_2/jez110.020/5510907](https://academic.oup.com/hjcmimaging/article/20/Supplement_2/jez110.020/5510907) by guest on 23 April 2024
